# Supplementary material for: Highly efficient luminescent side-chain polymers with short-spacer attached tetraphenylethylene AIEgens via RAFT polymerization capable of naked eye explosive detection
Source: Royal Society of Chemistry journal article supplement (doi:10.1039/c8py00710a), 2018-01-01
Supplement: c8py00710a1.pdf [file c8py00710a1.pdf]

## Supporting Information

# Highly efficient luminescent side-chain polymers with short-spacer attached tetraphenylethylene AIEgens via RAFT polymerization capable of naked eye explosive detection

Qian Li,<sup>a</sup> Xiao Li,<sup>a</sup> Zhongying Wu,<sup>a</sup> Yuhao Sun,<sup>a</sup> Jianglin Fang<sup>b</sup> and Dongzhong Chen<sup>a,\*</sup>

<sup>a</sup> Key Lab of High Performance Polymer Materials and Technology of MOE, Collaborative Innovation Center of Chemistry for Life Sciences, Department of Polymer Science and Engineering, School of Chemistry and Chemical Engineering, Nanjing University, Nanjing 210023, China

\*E-mail: cdz@nju.edu.cn

<sup>b</sup> Center for Materials Analysis, Nanjing University, Nanjing 210093, China

## Supplementary Figures

- 1、 Typical ESI-MS profile for monomers
- 2、 Representative <sup>1</sup>H-NMR, <sup>13</sup>C-NMR spectra
- 3、 GPC curves of *P0-P5*
- 4、 Fluorescence emission spectra of *P1, P3, P4, P5*
- 5、 The aggregated polymer particle sizes in mixture solvent measured via DLS
- 6、 UV-vis spectra of *P0* in solution and in film state
- 7、 The dimension of single chain columns of the short spacer side-chain polymers *P0, P1* and *P2*
- 8、 Fluorescence detection of TNT with polymer *P0* film spin-coated on quartz

## 1. Typical ESI-MS profile for monomers

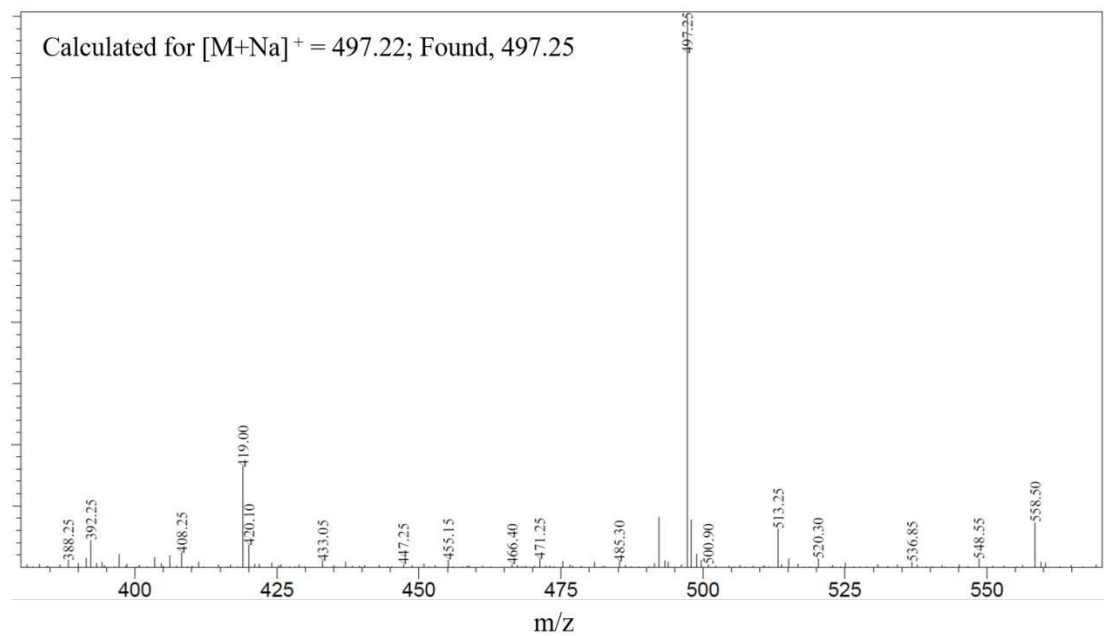

**Fig. S1** The electrospray ionization mass spectrum (ESI-MS) profile of monomer M(4).

## 2. Representative $^1\text{H}$ -NMR, $^{13}\text{C}$ -NMR spectra

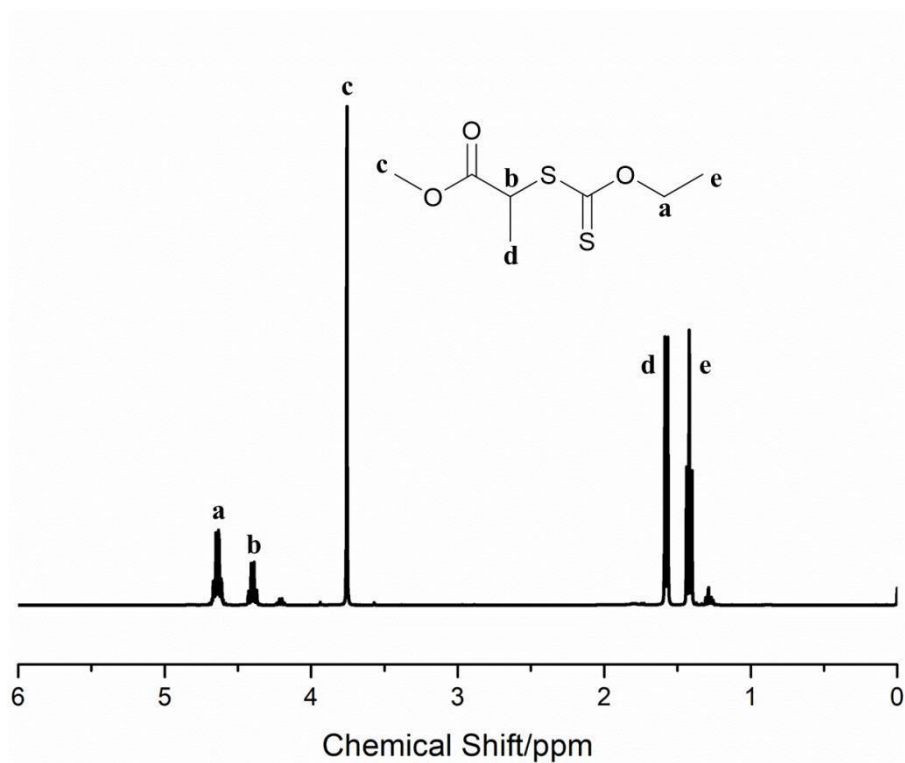

**Fig. S2**  $^1\text{H}$ -NMR spectrum of chain transfer agent (CTA).

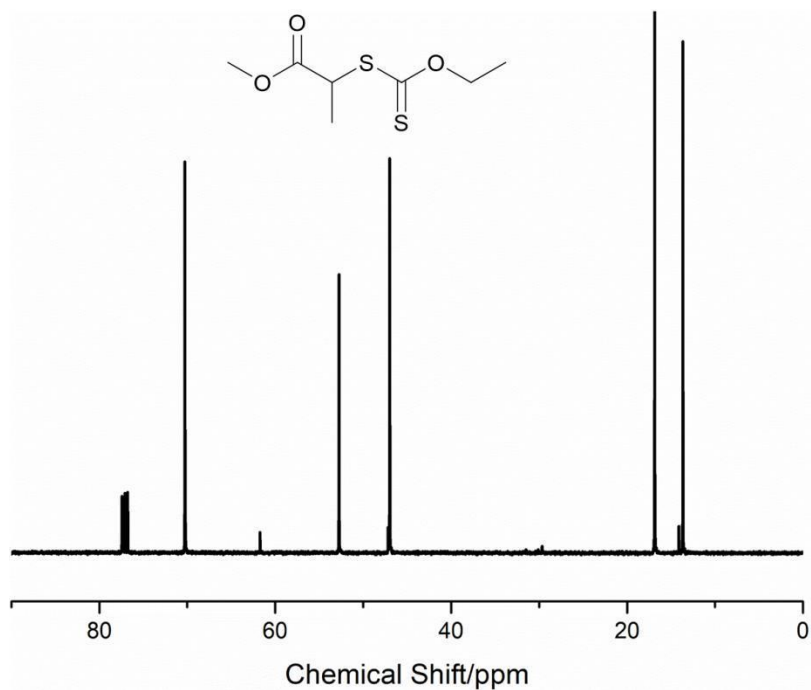

**Fig. S3**  $^{13}\text{C}$ -NMR spectrum of CTA.

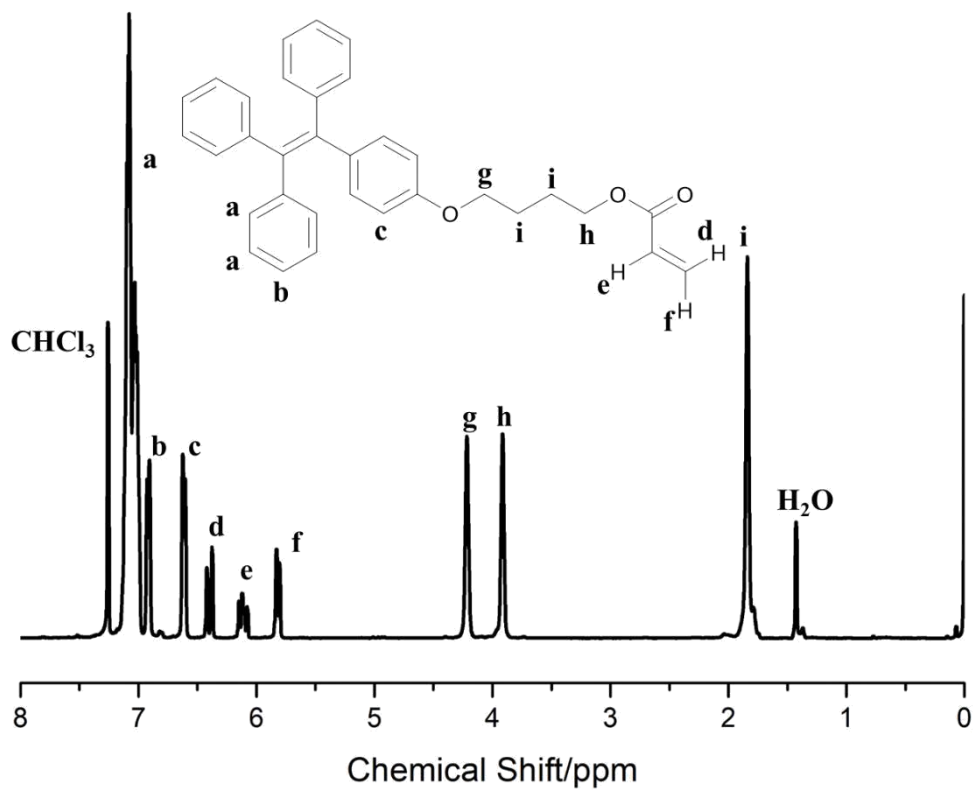

Fig. S4 <sup>1</sup>H-NMR spectrum of monomer M(4).

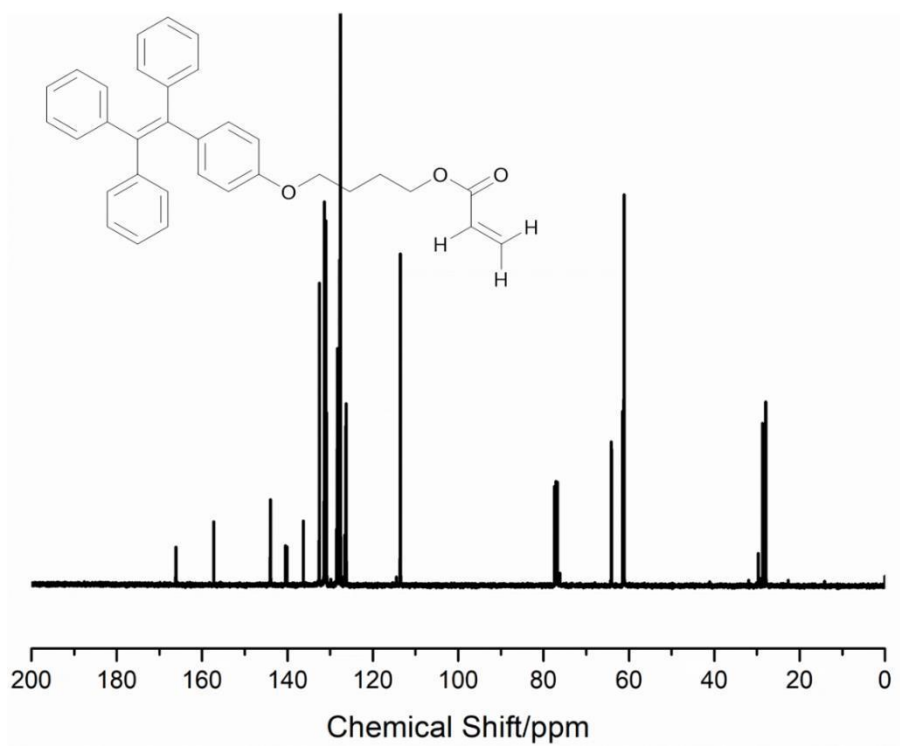

Fig. S5 <sup>13</sup>C-NMR spectrum of M(4).

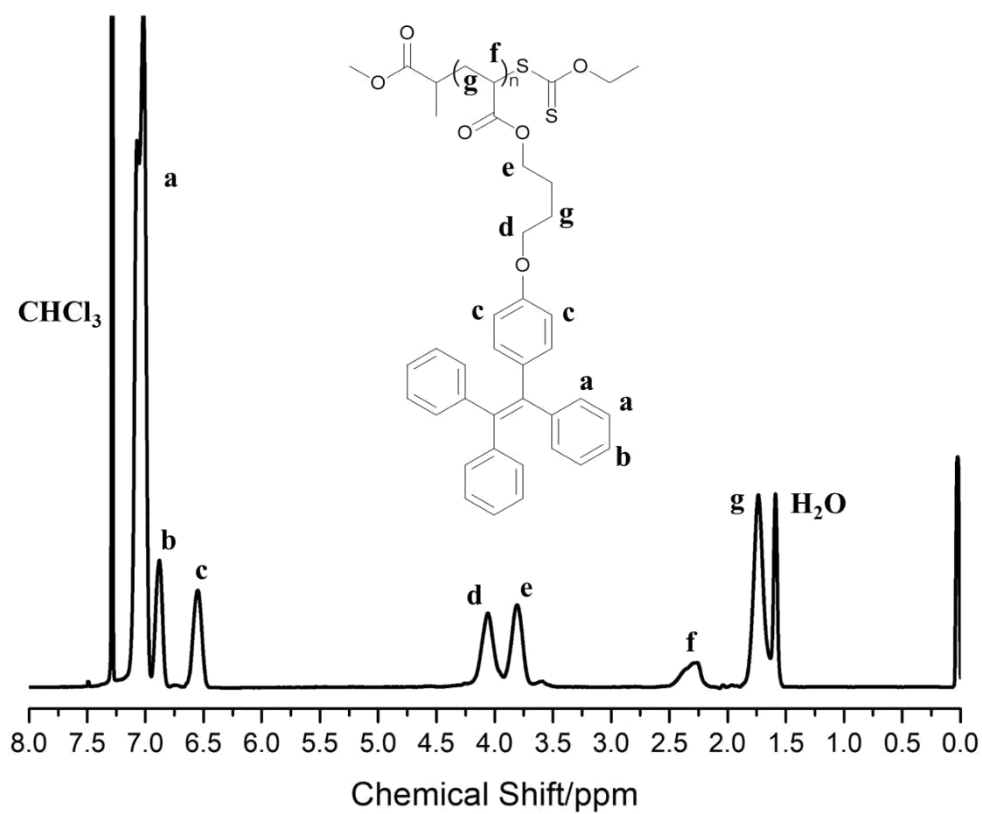

**Fig. S6** <sup>1</sup>H-NMR spectrum of polymer *P4*.

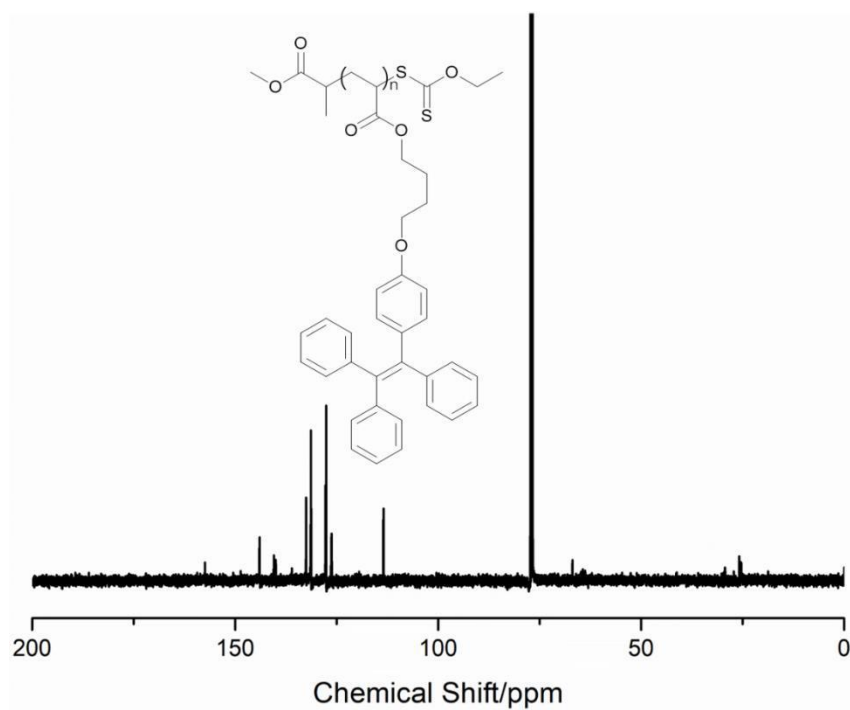

**Fig. S7** <sup>13</sup>C-NMR spectrum of *P4*.

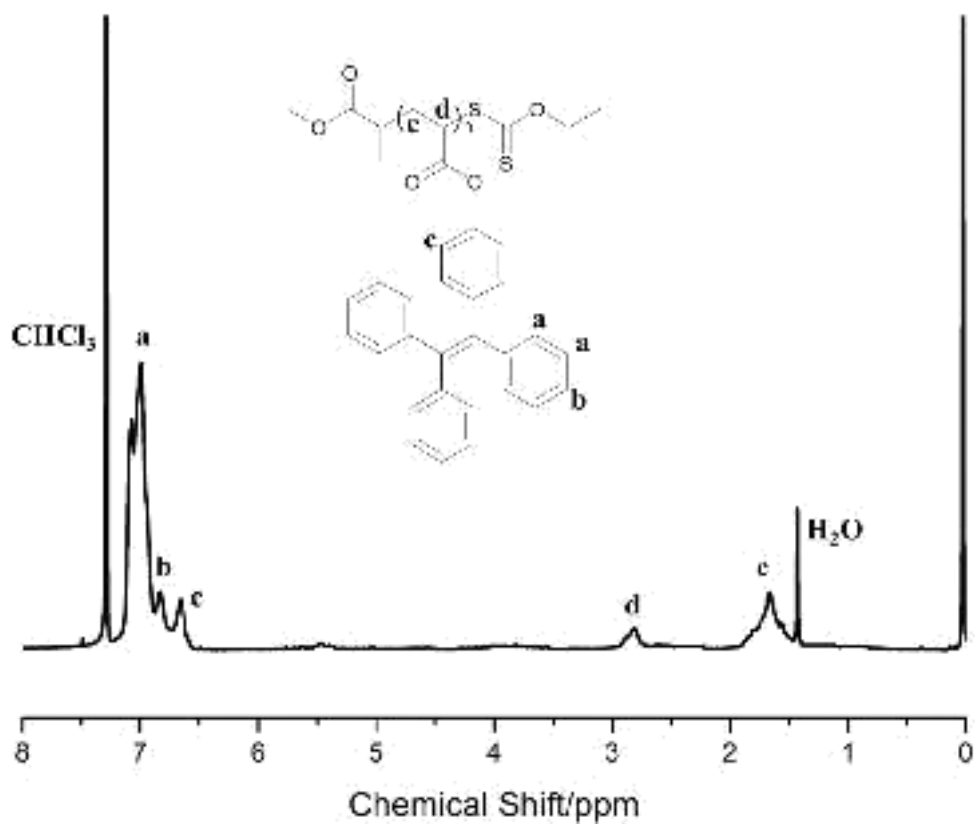

**Fig. S8**  $^1\text{H-NMR}$  spectrum of polymer *P0*.

### 3. GPC curves of *P0-P5*

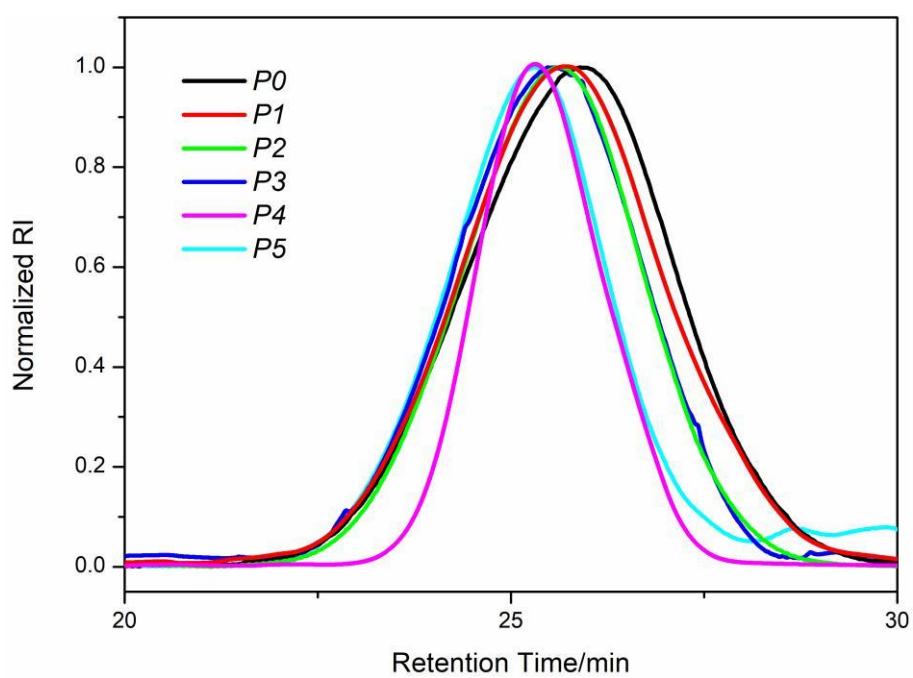

**Fig. S9** GPC curves of *P0-P5*.

#### 4. Fluorescence emission spectra of *P1*, *P3*, *P4*, *P5*

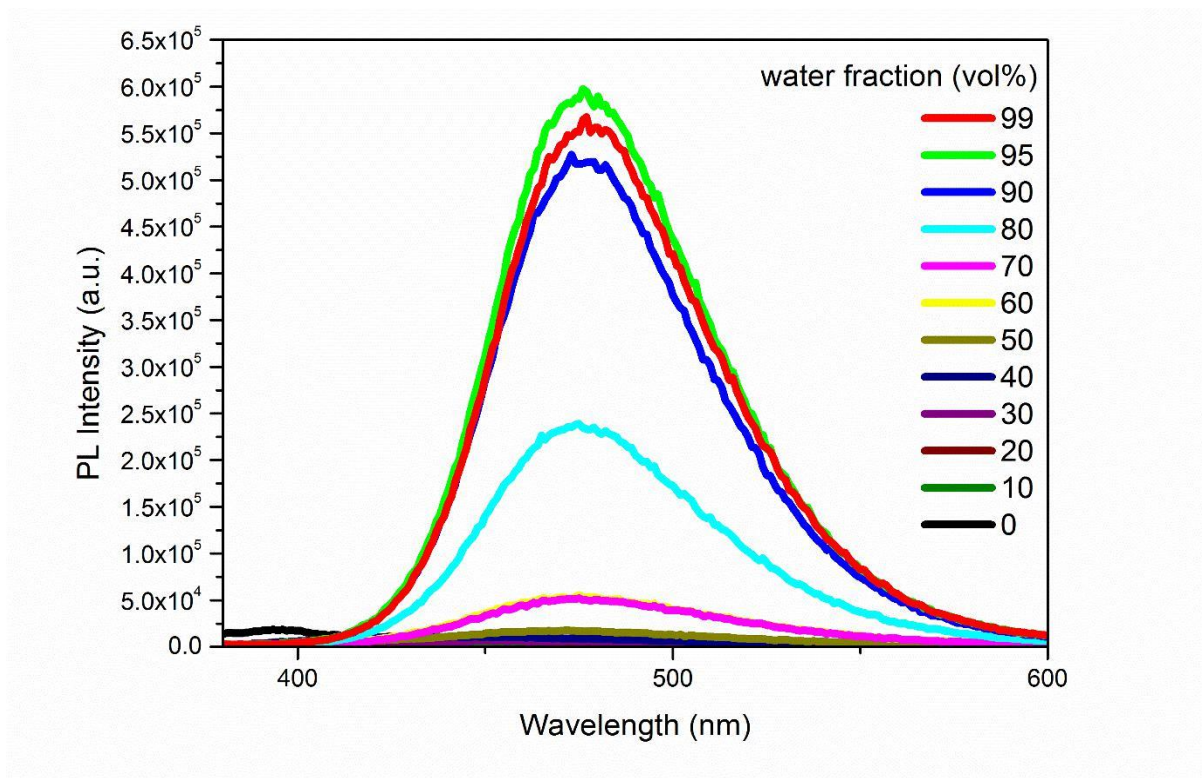

**Fig. S10** Fluorescence emission spectra of *P1* in THF and THF/H<sub>2</sub>O mixture solutions with different water fractions at a fixed concentration (1.0 mg/mL,  $\lambda_{\text{ex}} = 360$  nm).

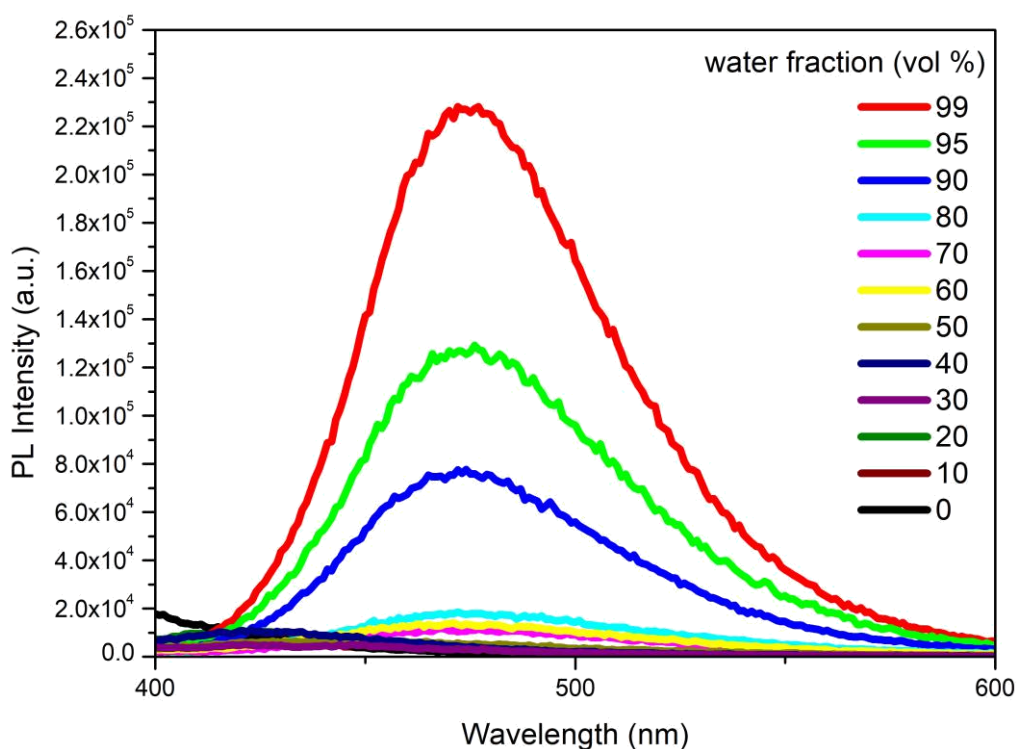

**Fig. S11** Fluorescence emission spectra of *P3* in THF and THF/H<sub>2</sub>O mixture solutions with different water fractions at a fixed concentration (1.0 mg/mL,  $\lambda_{\text{ex}} = 360$  nm).

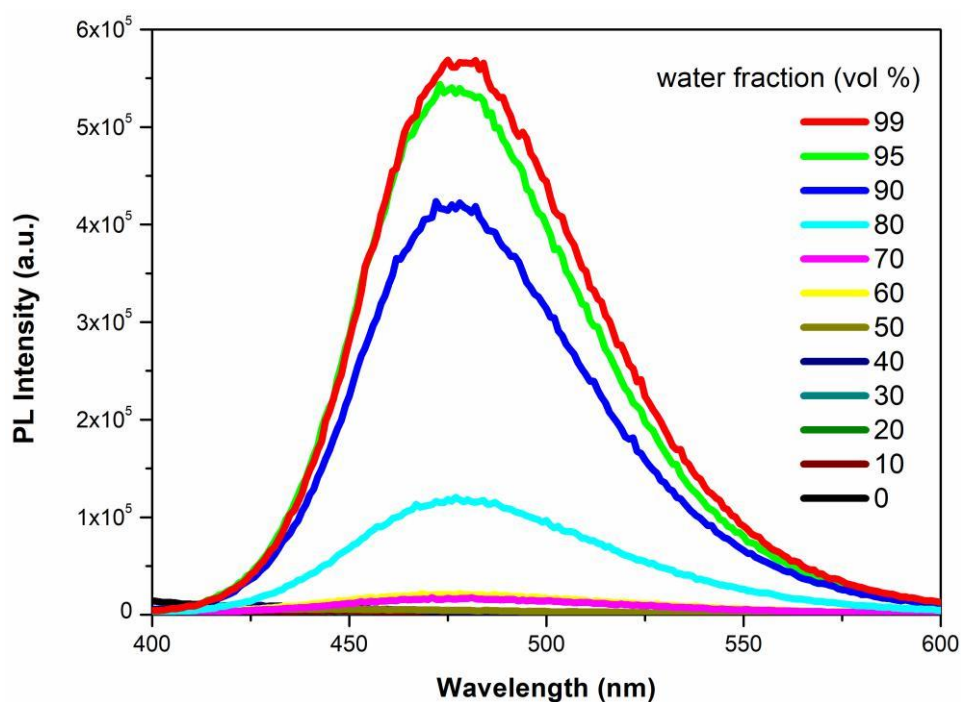

**Fig. S12** Fluorescence emission spectra of *P4* in THF and THF/H<sub>2</sub>O mixture solutions with different water fractions at a fixed concentration (1.0 mg/mL,  $\lambda_{\text{ex}} = 360$  nm).



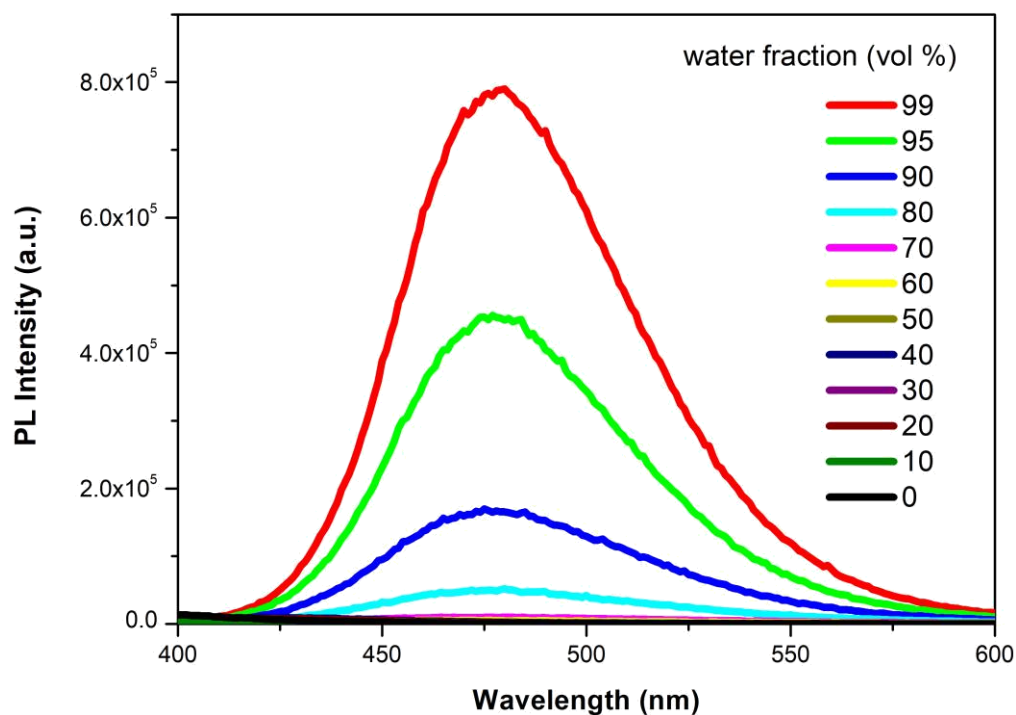

**Fig. S13** Fluorescence emission spectra of *P5* in THF and THF/H<sub>2</sub>O mixture solutions with different water fractions at a fixed concentration (1.0 mg/mL,  $\lambda_{\text{ex}} = 360$  nm).

### 5. The aggregated polymer particle sizes in mixture solvent measured via DLS

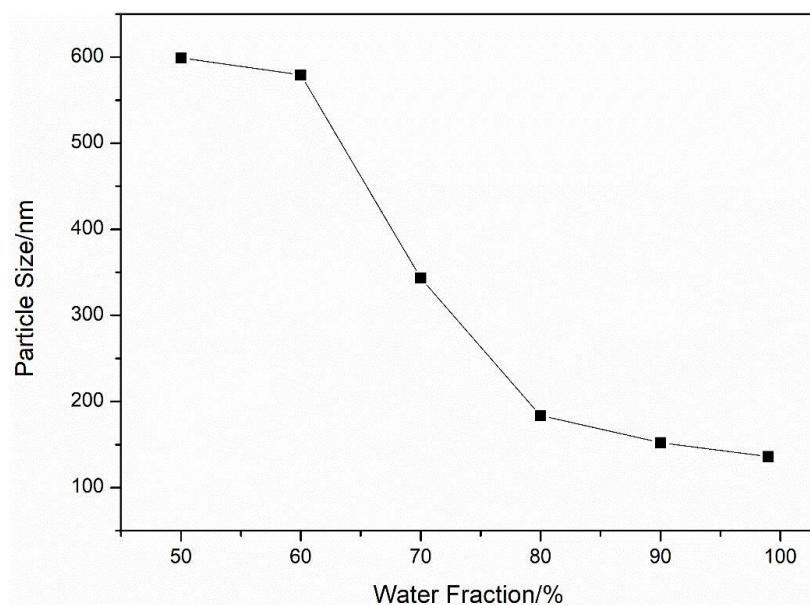

**Fig. S14** The changing trend of aggregated particle sizes of polymer *P2* in THF/H<sub>2</sub>O mixture solvent measured using dynamic light scattering (DLS).

## 6. UV-vis spectra of *P0* in solution and in film state

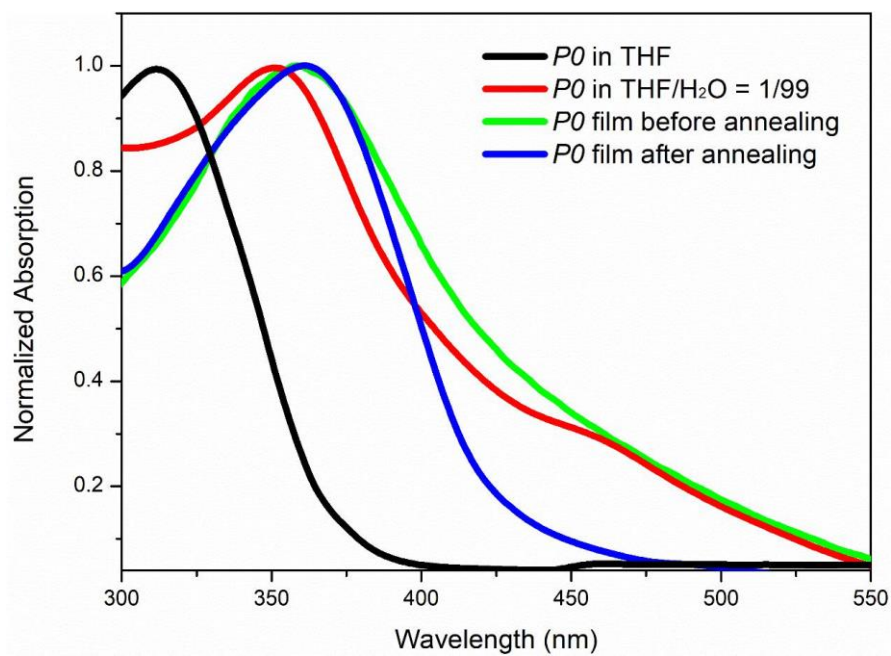

**Fig. S15** UV-vis spectra of *P0* in solution and in film state (with peak value 312 nm in THF, 351 nm in THF/H<sub>2</sub>O (1/99, v/v), 360 nm in film state before and after annealing).

**7. The dimension of single chain columns of the short spacer side-chain polymers *P0*, *P1* and *P2***

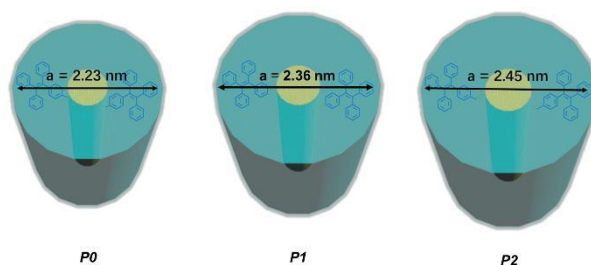

**Fig. S16** Schematic representation of single chain column of the short spacer side-chain polymers *P0*, *P1* and *P2* in compact structure after annealing.

**8. Fluorescence detection of TNT with polymer *P0* film spin-coated on quartz**

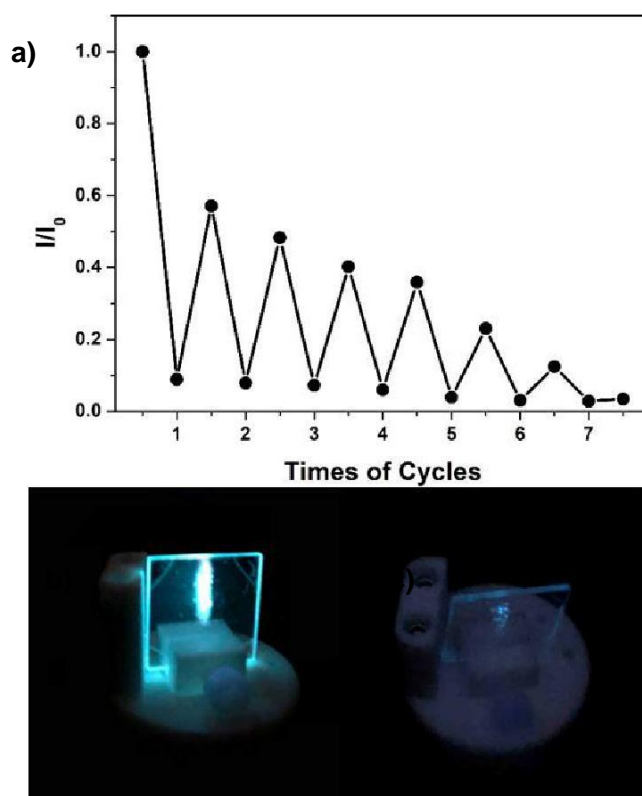

**Fig. S17 a)** The fluorescence intensity changes upon several cycles of quenching and restoring of *P0* film spin-coated on quartz; Photographs of the spin-coated film on quartz **b)** as prepared, **c)** after quenched with 5 ppm TNT solution.
